1 **Title:** Urban warming inverse contribution on risk of dengue transmission in the  
2 southeastern North America

3

4 **Authors:** Lorena M. Simon<sup>1,2</sup>, Jesús N. Pinto-Ledezma<sup>3</sup>, Robert R. Dunn<sup>2</sup>, Thiago Rangel<sup>4</sup>

5 <sup>1</sup>Programa da Pós-Graduação em Ecologia e Evolução, Universidade Federal de Goiás,  
6 Goiânia, Goiás 74.690-900, Brazil

7 <sup>2</sup>Department of Applied Ecology, North Carolina State University, Raleigh, NC, 27695  
8 USA

9 <sup>3</sup>Department of Ecology, Evolution, and Behavior, University of Minnesota, 1479  
10 Gortner Avenue, Saint Paul, Minnesota 55108

11 <sup>4</sup>Departamento de Ecologia, Instituto de Ciências Biológicas, Universidade Federal de  
12 Goiás, CP 131, Goiânia, Goiás 74001, Brazil

13

#### 14 **CORRESPONDENCE**

15 **Name:** Lorena M. Simon

16 **Address:** Programa da Pós-Graduação em Ecologia e Evolução, Universidade Federal de  
17 Goiás, Goiânia, Goiás 74.690-900, Brazil

18 **Email:** loressimon@gmail.com

19

#### 20 **ABSTRACT**

21 1. Preventing diseases from becoming a problem where they are not is a common  
22 ground for disease ecology. The expectation for vector-borne diseases,  
23 especially those transmitted by mosquitos, is that warm and wet conditions

24 favor vector traits increasing transmission potential. The advent of urbanization  
25 altering inner climate conditions hazards to increase mosquito's transmission  
26 potential on "disease-free" cooler areas as a consequence of a warming urban  
27 heat island (UHI) effect.

28 2. We assessed the realism of the anticipated dengue transmission potential into  
29 the southern United States in a causal pathway with the ongoing UHI effect,  
30 vectors' spatial distribution patterns, and exogenous environment; We also  
31 measured the climatic niche similarity between both dengue vectors species.

32 3. Our path model revealed that the UHI effect presents negative or no relation  
33 with dengue transmission potential. Instead, the surrounding non-urban  
34 temperature was rather suitable for the expected mosquitos' transmission  
35 potential.

36 4. Both dengue vectors' occurrence revealed to be more aggregated then expected  
37 by chance. These mosquitos' density patterns were responsive to the warming  
38 effect of UHI- especially *Aedes Aegypti*- but not a reliable predictor for the  
39 anticipated dengue transmission potential pattern. The climatic niches of both  
40 vectors are not equivalent. Although currently highly overlapped, there is a wide  
41 space of their climatic niche still to be filled.

42 5. *Policy implications.* We highlight that the warming UHI effect on urban sites is  
43 not congruent with the expected suitability for dengue transmission. Instead,  
44 non-urban areas would be a better focus for dengue hazards into the southern  
45 United States. Our study also highlights the need for including low scale  
46 temperature on further mosquito-borne disease transmission models and track  
47 vectors niche filling under anthropogenic changes.

48 **KEYWORDS:** disease potential, dengue, temperature suitability, mosquito,  
49 macroecology of disease transmission, niche overlap, urban heat island effect (UHI),  
50 vector capacity

## 51 **1. INTRODUCTION**

52 Vector-borne pathogens are characterized by their dependence on vectors, in  
53 general arthropods (*e.g.*, mosquitoes), that feed on blood to proceed the infection cycle  
54 (Gubler, 2002). Their resulting diseases represent one of the greatest challenges faced  
55 by public health worldwide (World Health Organization, 2014). Some critical vector-  
56 borne diseases, such as; dengue, chikungunya, and Zika, which were formerly restricted  
57 to tropical and subtropical regions, have begun to spread into new parts of the world as  
58 a consequence of accidental introductions of vectors and pathogens along with changes  
59 in climate and habitat distributions (Gubler, 2001; Murray et al., 2015).

60 Despite the complex nature of vector-borne diseases transmission,  
61 understanding main drivers of its geographic spread is crucial for monitoring potential  
62 impacts on public health (World Health Organization, 2014). Vector transmission is  
63 linked with traits such as the biting rate, life span, and inner incubation period albeit  
64 also the abundance of vector species (Watts et al., 2018). Recently, studies have  
65 considered the temperature role on vector traits to assess the environmental suitability  
66 range for transmission capacity (*e.g.*, Brady et al., 2014; Ryan et al., 2019). This  
67 geographical perspective highlights the potential of macroecological analyses on disease  
68 ecology and public health strategies against the burden of disease transmission  
69 (Stephens et al., 2016). In this sense, the usage of transmission potential spatial patterns  
70 on causal structures with acknowledged exogenous drivers (*e.g.*, urban features), rise as

71 a promising research area to infer causal pathways on disease ecology, ultimately  
72 orienting effective strategies on public health surveillance (Kraemer et al., 2019,  
73 Mordecai et al., 2019).

74         Some of the most consequential vectors species, including *Aedes aegypti* and  
75 *Aedes albopictus*, have lifestyles adapted to the ecology of urban settings and inner  
76 climatic conditions have the potential to favor their vector traits (Arnfield, 2003; Gloria-  
77 Soria et al., 2018). Urban sites might exhibit higher temperatures than surrounding, a  
78 phenomenon called ‘Urban Heat Island’ (UHI), and changes in the global climate and  
79 human population growth are expected to intensify the UHI conditions (Zhao et al.,  
80 2014; Manoli et al., 2019). As ectotherms, mosquito behavior, abundance, fitness and  
81 distribution patterns can be strongly affected by small changes in temperature  
82 (Amarasekare & Savage, 2011; Huey et al., 2012). In cooler regions, relative to mosquito  
83 species thermal optima, it is expected that species’ abundance might increase with UHI  
84 effect, particularly at range margins of mosquito species (Ladeau et al., 2015; Kraemer  
85 et al., 2019). In addition, even where mosquito species do not increase in abundance,  
86 their vectorial capacity might increase with the UHI effects (Araujo et al., 2015; Murdock  
87 et al., 2017). Conversely, UHI effects in areas already near the thermal maxima of a  
88 mosquito species may lead to decreases in their vectorial capacity (Mordecai et al.,  
89 2019). For instance, known upper thermal bounds for dengue transmission is 34.0 C° for  
90 *Ae. aegypti* and 29.4 C° for *Ae. albopictus* (Ryan et al., 2019). However, even though UHI  
91 effects might increase the potential for a disease outbreaks at the range margins of  
92 vector mosquitoes, UHI effects have received little attention in the infectious disease  
93 ecology (Misslin et al., 2016).

94 Dengue is a neglected disease that has rapidly expanded geographically over the  
95 last decades (Gubler, 2002; Ramos-Castañeda et al., 2017), and although *Ae. aegypti*  
96 was historically considered the main responsible for dengue urban transmission, *Ae.*  
97 *albopictus* has starred in recent major outbreak events (Lambrechts et al., 2010).  
98 Despite of their differing invasion timing and native origins (Kaplan et al., 2010), both  
99 vector species are currently listed among worst invasive organisms (Global Invasive  
100 Species Database, IUCN). In a recent future, both species are expected to spread farther  
101 north and south into temperate regions along with climate changes (Kraemer et al.,  
102 2019). Besides, the ongoing co-occurrence and continuing spread of both vectors in  
103 “dengue-free” areas, such as the southeastern North America, aggravates the  
104 temperature suitability predictions of dengue transmission into these areas under  
105 current and future climate conditions (Brady et al. 2014; Rosenberg et al., 2018; Messina  
106 et al., 2019), given the lack of heard immunization (Johnson et al., 2017).

107 In the present work, we aim to evaluate the realism of the geographical pattern  
108 on dengue transmission potential in the face of the urban heat island effect (UHI) and  
109 existing vectors distribution in the southeastern United States. To achieve our goal, we  
110 take two steps. Foremost, we build a correlative path structure (Fig. 1) to comprise the  
111 weight of UHI effect and other urban features on observed dengue potential pattern;  
112 and, as burden of dengue transmission largely reflects the distribution and density of  
113 the mosquito vectors, we also consider both the effect of urban features in increasing  
114 *Ae. aegypti* and *Ae. albopictus* clustering and the dengue transmission risk resulting from  
115 their distribution pattern. Second, as the niche similarity between these important  
116 mosquito vectors is unclear, we additionally use a niche overlap approach to compare  
117 the climatic niches of both species assuming that, in spite of sharing similar geographical

118 spaces, they do not have equivalent niches, which would result in low overlap between  
119 vectors niche and in current avoidance of dengue outbreak on the region.

## 120 2. MATERIALS AND METHODS

### 121 (a) Data

#### 122 (i) *Vector species occurrence*

123 The *Ae. aegypti* (*Stegomyia aegypti*) and *Ae. albopictus* (*Stegomyia albopicta*)  
124 occurrence was obtained from Kraemer et al. (2015) available at  
125 <http://datadryad.org/resource/doi:10.5061/dryad.47v3c> and improved with last  
126 published records (Johnson et al., 2017). This comprehensive dataset is a compilation of  
127 occurrence point records over the last 57 years (1960 – 2017) documented in previous  
128 studies– Kraemer et al., 2015; Hahn et al. 2016; 2017. To latter evaluate each specie  
129 density in southeastern United States we selected the occurrence points located into  
130 the region, ultimately comprising 1227 and 217 records of *Ae. albopictus* and *Ae.*  
131 *aegypti*, respectively.

#### 132 (ii) *Dengue transmission suitability*

133 To assess the geographic range of dengue transmission potential we used  
134 Brady's *et al.* (2014) global consensus map of vector transmission suitability based on  
135 temperature, from which we extracted the information within the southeastern United  
136 States. This map is a result of a mechanistic model derived from experimental data that  
137 assess vector traits of dengue transmission (*e.g.*, mosquito survival; extrinsic incubation  
138 period [EIP]) based on temperature effect, separately for *Ae. aegypti* and *Ae. albopictus*,

139 and spatialized using a global temperature dataset with 1km resolution (see Brady *et al.*  
140 (2014) for modeling approach details). Their output predicted areas where global  
141 temperature support year-round dengue transmission given the presence of an infected  
142 individual (*i.e.* the basic reproduction number,  $R_0$ ) ranging from 0 to 1, for each vector  
143 species, where within pixel values closest to 1 indicate a higher potential for the virus  
144 transmission.

145 *(iii) Meteorology and land use*

146 To test the effect of urban differential temperature on dengue transmission  
147 suitability we used the UHI dataset from 'NASA Socioeconomic Data and Applications  
148 Center' (SEDAC, 2016), available at [http://sedac.ciesin.columbia.edu/data/set/sdei-](http://sedac.ciesin.columbia.edu/data/set/sdei-global-uhi-2013/data-download)  
149 [global-uhi-2013/data-download](http://sedac.ciesin.columbia.edu/data/set/sdei-global-uhi-2013/data-download). The UHI data comprises the estimate of summer  
150 daytime maximum and nighttime minimum surface temperature within urban extent  
151 and surrounding non-urban areas (buffer of 10 km), and the difference between them,  
152 in Celsius degrees. Here we used both daytime and nighttime temperatures, once vector  
153 activity is referred to be even superior at nighttime than it is in daylight (Stoddard *et al.*,  
154 2009). The global GeoTIFF is in the resolution of 30 arc-seconds (~1Km), on which we  
155 made a subset based on southeastern United States area.

156 To account for the influence of other urban-modified features on vectors density  
157 and dengue transmission we obtained the data referent to precipitation and wind speed  
158 from NASA Langley Research Center (LaRC) POWER Project, available at  
159 <https://power.larc.nasa.gov/data-access-viewer/>. Both variables represent the average  
160 annual information in a 0.5° global grid. The wind speed data is scaled on 2 meters  
161 elevation, accounting for the limited space of mosquito's activity (Reisen *et al.*, 2003;

162 Guerra et al., 2014). The land-cover features, known to increase mosquito vectors  
163 density due to anthropogenic changes favoring species associated with urban areas  
164 (Beaulieu et al., 2019), were obtained in 1-km resolution (Tuanmu & Jetz, 2014). The  
165 data account for 7 land-cover classes (*i.e.*, Evergreen/Deciduous Needleleaf Trees,  
166 Deciduous Broadleaf Trees, Mixed/Other Trees, Herbaceous vegetation, Cultivated and  
167 Managed Vegetation, Regularly Flooded Vegetation and Urban/Built-up) chosen based  
168 on their matter on vector settlement and ultimate dengue transmission (Guerra et al.,  
169 2014).

170 Finally, to build and later compare both vector species niche we delimited the  
171 niche boundaries using bioclimatic variables, which are widely accepted given its  
172 robustness to represent seasonal trends and physiological constrains of species (Lobo  
173 et al., 2010). In this sense, we used all 19 bioclimatic variables from WorldClim dataset  
174 on the resolution of 30 arc-seconds, available at <http://www.worldclim.org/>.

## 175 **(b) Analysis**

### 176 *(i) Density estimation*

177 For the estimation of vector density across southeastern U.S., we used the point  
178 pattern approach based on species occurrence data. Firstly, to account for bias in point  
179 density estimation, we applied the rarefaction curve, commonly used to quantify bias in  
180 presence counting measures (Gotelli & Colwell, 2001), with the R package *iNEXT* (Hsieh  
181 et al., 2019). Then, we used the R package *spatstat* (Baddeley et al., 2015), where we  
182 performed a near neighbor analyses (ANN) between vector occurrence records and  
183 compared with a commonly used null model based on the distribution of simulated ANN  
184 values given the Complete Spatial Random (CSR) point process (Wiegand & Moloney,



185 2004; Baddeley et al., 2014). To generate a vector density raster, we used the Kernel  
186 density estimation to interpolate around each point, for which we established the  
187 bandwidth value of 0.5 to give weight to distant points contribution on density  
188 estimation using the R package *KernSmooth* (Wand, 2015).

189 *(ii) Path model*

190 To recover the underlying direct and indirect causal mechanisms between UHI  
191 and other features on dengue transmission suitability on the southeastern United States  
192 (Fig. 1) we used the structural equation modeling (SEM) approach with the R package  
193 *lavaan* (Rosseel, 2012). Usually, the SEM model is applied to mediate causal  
194 assumptions, which assumes that the presumed explanatory variables can influence an  
195 outcome directly and indirectly through other variables (Fan et al., 2016). However, SEM  
196 does not account for spatial information and the autocorrelation that frequently arise  
197 when dealing with spatially explicit structures, which ultimately inflates the type I error  
198 given the lack of independence between observations across space (Legendre &  
199 Legendre, 1998).

200 Aiming to consider the spatial autocorrelation and provide unbiased regression  
201 coefficients we used eigenvector-based spatial filters, which consist on extracting the  
202 eigenvectors of a distance matrix describing the spatial structure of the data and adding  
203 them as additional predictors into the SEM model (Griffith, 2003). First, we extracted  
204 the geographical coordinates along southeastern U.S. to build a distance matrix, which  
205 was truncated at the distance of 300 km based on a previous evaluation of the Moran's  
206 I correlogram. Then, the truncated matrix was submitted to a principal coordinate  
207 analyses (PCO) and its resultant eigenvectors were selected as predictors based on

208 significance of each partial regression coefficients (following Borcard & Legendre, 2002).  
209 For the spatial filter approach, we used the R packages *letsR* (Vilela & Villalobos, 2015)  
210 and *ecodist* (Goslee et al., 2007).

### 211 (iii) Niche overlap

212 In order to estimate the overlap between dengue vectors niches and test the  
213 hypothesis of niche non-equivalence we used the framework proposed by Broennimann  
214 et al. (2012). The method assesses niche overlap by calibrating a principal component  
215 analysis on the environmental space (PCA-env) and use kernel density smoothing to  
216 correct potential sampling bias (Broennimann et al., 2012). We used the R package  
217 *ecospat* (Di Cola et al., 2017) to pull the bioclimatic information, according to the species  
218 occurrence, and create a background environmental space to perform the PCA. Thus,  
219 the 1<sup>st</sup> and 2<sup>nd</sup> output axes were used to create a 100 x 100 occurrence density grid  
220 representing each specie niche. The estimated niches was overlapped and the degree  
221 of intersection was assessed using Schoener's D metric (following Warren et al. 2008)–  
222 which ranges between 1 (*i.e.*, complete overlap) and 0 (*i.e.*, no overlap) –and compared  
223 with 100 random simulated overlap index distribution to test for niche equivalence and  
224 niche similarity.

## 225 3. RESULTS

### 226 (a) Density estimation

227 The test for vector occurrence point pattern clustering/dispersion on the  
228 southeastern region of United States showed that, when compared with a null  
229 distribution of average distance among geographic points, the distance between  
230 occurrence points density, for both *Ae. albopictus* and *Ae. aegypti*, are greater than

231 expected. Even though, *Ae. aegypti* density pattern revealed higher concentration into  
232 Florida and Louisiana, while *Ae. albopictus* showed a more diffused occurrence density,  
233 with higher weight into the northern portion of southeastern U.S. like Virginia (Fig. 4).

#### 234 **(b) Path model**

235 The SEM revealed that the combined influence of diurnal and nocturnal UHI,  
236 wind speed, precipitation and land-use- including spatial filters - explained respectively  
237 49% and 54% of the variance on *Ae. aegypti* and *Ae. albopictus* density (Fig. 2). In  
238 addition, the interaction between vectors occurrence density, UHI and further  
239 predictors explained 92% and 90% of variation on dengue transmission suitability  
240 respectively by *Ae. aegypti* and *Ae. albopictus* into the southeastern U.S. (Fig. 2). The  
241 addition of spatial filters on SEM structure to take in account the unknown endogenous  
242 and exogenous influence shaping dengue transmission suitability pattern, improved the  
243 model fit based on Akaike information criterion (AIC) and r square. The inclusion of 20  
244 spatial filters on *Ae. aegypti* path model adjusted the AIC from 15356.419 to 11631.864  
245 and the R<sup>2</sup> from 0.5 to 0.9, and the 30 spatial filters included on *Ae. albopictus* model  
246 adjusted the AIC from 15655.011 to 11845.485 and the R<sup>2</sup> from 0.34 to 0.9 (Table 1).

247 The resulting SEM causal path indicated that daytime UHI (Fig. S1) is negatively  
248 correlated with dengue transmission suitability ( $\beta = -0.03$ ; sites with a greater UHI effect  
249 are less suitable for transmission by vectors) but positive with the density of both  
250 vectors ( $\beta = 0.05$ ;  $0.02$ ; sites with a greater UHI effect have more of both mosquito  
251 species), although the effect on the density pattern of *Ae. albopictus* is not significant.  
252 In contrast to the effect of daytime UHI, the UHI effect during nighttime (Fig. S1) was  
253 not significantly correlated with dengue transmission suitability in the southeastern U.S.

254 Interestingly, the density of both vector species was negatively correlated with  
255 nighttime UHI ( $\beta = -0.04$ ) (Fig. 2; Table 1), such that the effect of daytime UHI and  
256 nighttime UHI were in the opposite directions for the mosquito species agglomeration  
257 pattern. Precipitation was strongly positively correlated with the density of both vectors  
258 ( $\beta = 0.31$ ;  $0.23$ ), while its effect in dengue transmission suitability was not significant.  
259 The SEM path output also indicated that wind speed has a high negative effect on the  
260 density of both vector species ( $\beta = -0.19$ ;  $-0.07$ ), however it showed a positive  
261 association with dengue transmission suitability by *Ae. aegypti* ( $\beta = 0.07$ ) and *Ae.*  
262 *albopictus* ( $\beta = 0.013$ ). The effect of land-use over dengue predictors was indirect via its  
263 influence on UHI ( $\beta = 0.07$ ;  $0.05$ ). Moreover, the occurrence density of the two vectors  
264 was not correlated with dengue transmission suitability in the southeastern U.S. (Fig. 2;  
265 Table 1).

### 266 (c) Niche overlap

267 Schoener's D niche overlap index revealed a high level of overlap between *Ae.*  
268 *albopictus* and *Ae. aegypti* niches (Fig. 3). The niche similarity test showed that niche  
269 overlap comparisons between one randomly distributed over the unchanged other (1 -  
270 > 2) and vice versa (2 -> 1) had a Schoener's D of 0.44, thus distant from a completely  
271 unrelated scenario (*i.e.*,  $D = 0$ ). The vector species niches are represented by the 1<sup>st</sup> axes  
272 of the PCA-env, that is associated with temperature-related bioclimatic variables, and  
273 by the 2<sup>nd</sup> axes, that is associated with precipitation-related variables. In spite of the  
274 high niche overlap and similarity of both vectors species, the result of the one-tailed  
275 niche equivalence test showed a significantly lower niche equivalence between both  
276 main dengue vectors ( $p$ -value = 0.001).

277 **4. DISCUSSION**

278 Contrary to previous expectations that urban heat islands (UHI) effect might favor  
279 dengue transmission, our results suggest that areas under UHI stress have lower risk of  
280 the disease spread by its both main vectors. The threat of dengue transmission potential  
281 into the southeastern U.S. has been placed decades ago based on mosquito vectors  
282 invasion (Monath, 1994). The incorporation of temperature on disease transmission  
283 models later reinforced the predictions of *Ae. aegypti* and *Ae. albopictus* potential  
284 dengue transmission into the region under current and future global climate (Brady et  
285 al., 2014; Messina et al., 2019). However, here we show that the downscaled  
286 temperature difference between warmer urban and cooler sub-urban areas– the so  
287 called UHI –have a contrasting inverse relation with dengue transmission potential (Fig.  
288 2; Table 1). Contrary to the expectation that warmer conditions generally promote  
289 mosquito borne disease (Morin et al. 2015; Thomson et al. 2017). Still, UHI effect, wind  
290 speed, and precipitation all together were highly congruent with the expectation of  
291 dengue transmission suitability on the southeastern U.S., which aligns with the concern  
292 of urbanization style shaping the probability of mosquito-borne disease transmission  
293 (Gubler, 2011).

294 The starting point for realized dengue transmission depends primarily on the  
295 presence of virus strains, susceptible host population and competent vectors (Gubler,  
296 2011). Year-round adequate temperature determining transmission competence of  
297 mosquito vectors (Ryan et al., 2019), in combination with precipitation, ultimately zenith  
298 seasonal dengue cycles into tropical endemic areas (Van Panhuis et al., 2015). In  
299 contrast, cooler subtropics are expected to avoid transmission following an unimodal

300 variation on vector-borne transmission that limits dengue around 18 C° (Ladeau, 2015;  
301 Mordecai et al., 2019). Here we outline that on summer the combination of temperature  
302 with other environmental features is congruent with dengue transmission potential and  
303 vectors accumulation on the subtropical southeastern U.S. (Fig. 2; Table 1). However,  
304 contrary to the expected higher dengue probability in warmer urban temperature  
305 (Halstead, 2008), transmission potential showed conformity with the sub-urban lower  
306 temperature. In fact, previous works highlighted that mosquito transmission increased  
307 around lower temperature ranges (Carrington et al., 2013), advocating for a  
308 thermoregulation scape from urban to bordering greener sites where environment  
309 afford thermal respite (Huey, 2012; Misslin et al. 2016). Still, the dengue potential  
310 contrast we found between urban and surrounding areas might also reflect the scale  
311 considered to predict the temperature range of dengue transmission potential, which  
312 ignores low scale environment where transmission takes place.

313 In cities where dengue transmission is a seasonal event, human population cluster  
314 share space with high density of mosquitoes, usually a strong predictor for arboviral  
315 transmission potential (Halstead, 2008; Ladeau et al., 2015). Our results otherwise  
316 showed that the density derived from occurrence data was not a good predictor of the  
317 dengue potential predicted by the temperature-based transmission model in the  
318 southeastern U.S. This result might either represent that the mosquito records within  
319 the studied area are not sufficient to predict the emergence of dengue, or that both  
320 species aggregation does not overlap the dengue transmission suitability areas.  
321 Although previous works have indicated a positive association between vector density  
322 and disease incidence (Walk et al., 2009), this association does not occur in all cases  
323 (Halstead, 2008). For instance, in Singapore the extreme reduction of *Ae. aegypti* density

324 did not avoid the continued dengue infection (Chan, 1985). Here we found that both  
325 mosquito species densities were more related with urban than suburban temperatures  
326 (Table S1), congruent with urban microclimates favoring vector population growth-  
327 while it has not reached thermal performance peak -(Huey et al., 2012; Mordecai et al.,  
328 2019). Additionally, day and nighttime UHI range revealed fully relation with *Ae. aegypti*  
329 density (Figs. 2, S1), a primarily urban specie when compared with the *Ae. albopictus*,  
330 which dominates in suburban areas (Beaulieu et al., 2019).

331 The southeastern U.S. have a particular precipitation regime with much higher  
332 humidity than other U.S. locations. Consequently, the UHI effect- which follows  
333 precipitation gradient (Manoli et al., 2019) -is increased in this region, where annual UHI  
334 effect is around 3.9 C° higher than dryer U.S. regions (Zhao et al., 2014). Besides the  
335 indirect effect on urban temperature higher precipitation is also expected to increase  
336 mosquito density by increasing breeding sites and oviposition (Halstead, 2008), and our  
337 results showed a positive association between precipitation and both species' densities,  
338 supporting this prediction. However, precipitation was not a good support for the  
339 dengue suitability range expected by the global temperature model. In this sense, the  
340 background effect of higher precipitation on the southeastern U.S. UHI might indirectly  
341 impose thermal limitations to dengue transmission range, even where wind speed is  
342 expected to facilitate the transmission contact (Cummins et al., 2012). To fully  
343 comprehend this complex association between precipitation and UHI on dengue  
344 transmission, further works should include the urban differential climate into mosquito-  
345 borne disease transmission models.

346 The niche comparison revealed that, in spite of distinct invasion time by dengue  
347 vectors into the southeastern U.S.- where there is a niche conservatism evidence for

348 both species (Cunze et al., 2018) -their occupied climatic space markedly overlap (Fig.  
349 4). Accordingly, given the observed low prediction of dengue transmission suitability by  
350 vector density on the southeastern U.S., the ongoing climatic space occupied by both  
351 species may be the main factor avoiding a dengue outbreak into the region, when other  
352 important features are favorable (*e.g.*, autochthonous virus, lack of heard immunity).  
353 However, our results also highlight that the climatic niche space of both species are not  
354 completely fulfilled (solid line Fig. 3), which ultimately indicate future potential for  
355 dengue transmission due to range expansion. In fact, Kraemer et al. (2019) showed that  
356 there is strong evidence for future *Ae. aegypti* and *Ae. albopictus* range expansion  
357 poleward with anthropogenic pressure, ultimately fulfilling the remaining suitable  
358 climatic space and increasing the risk of dengue transmission into subtropical areas like  
359 the southeastern U.S.

## 360 5. CONCLUSIONS

361 Here we highlight that the southeastern U.S suburban areas show higher realism  
362 with expected dengue transmission thermal bounds. If the expected dengue potential  
363 range is accurate, suburban great transmission suitability ultimately represent higher  
364 risk of infectious contact between humans and competent vectors once this is a  
365 residential zone. However, vectors density pattern did not show correspondence with  
366 the suitability range based on global temperature, which might indicate an  
367 underestimation of dengue risk on warmer urban areas. In addition, the niche space  
368 currently occupied by both vectors are similar but not equivalent, and part of their  
369 climatic niche remain unfilled, representing an ahead risk of vectors population grow  
370 into areas of dengue transmission competence. In this sense, range expansion of both



371 species under anthropogenic and climatic changes claim that the combat of mosquitoes  
372 must be intersected in areas where the contact of hosts and competent vectors  
373 represents a risk. Accordingly, here we suggest that considering the UHI effect on further  
374 predictive dengue transmission models might be crucial to accurately identify areas of  
375 dengue transmission risk. Moreover, further research is still needed to address the heat  
376 suitability on mosquito's traits to transmit other concerning viruses such as Zika and  
377 chikungunya (Carlson et al., 2018), in the light of virus and vector coevolution and  
378 evolutionary adaptation to new environments.

#### 379 **DATA ACCESSIBILITY**

380 This article has no additional data.

#### 381 **AUTHORS' CONTRIBUTIONS**

382 L.M.S. and R.R.D. conceived the project; L.M.S managed the project; L.M.S and J.N.P-L.  
383 conducted the analyses; all authors contributed to the project and/or drafting of the  
384 manuscript.

#### 385 **COMPETING INTERESTS**

386 The authors declare that the research was conducted in the absence of any  
387 commercial or financial relationships that could be construed as a potential conflict of  
388 interest.

#### 389 **FUNDING**

390 L.M.S. was supported by CAPES fellowship over PROEX PhD and the Sandwich Doctoral  
391 Program Abroad-PDSE. J.N.P-L. was supported by the University of Minnesota College  
392 of Biological Sciences' Grand Challenges in Biology Postdoctoral Program.

### 393 **ACKNOWLEDGMENTS**

394 We thank Brian Wiegmann and John Soghigian for the rich discussions about mosquito  
395 ecology and behavior.

### 396 **REFERENCES**

397 Amarasekare, P., & Savage, V. (2011). A framework for elucidating the temperature  
398 dependence of fitness. *The American Naturalist*, 179(2), 178-191. [doi: 10.1086/663677](https://doi.org/10.1086/663677)

399 Arnfield, A. J. (2003). Two decades of urban climate research: a review of turbulence,  
400 exchanges of energy and water, and the urban heat island. *International Journal of*  
401 *Climatology: a Journal of the Royal Meteorological Society*, 23(1), 1-26. [doi:](https://doi.org/10.1002/joc.859)  
402 [10.1002/joc.859](https://doi.org/10.1002/joc.859)

403 Araujo, R. V., Albertini, M. R., Costa-da-Silva, A. L., Suesdek, L., Franceschi, N. C. S.,  
404 Bastos, N. M., ... & Allegro, V. L. A. C. (2015). São Paulo urban heat islands have a  
405 higher incidence of dengue than other urban areas. *The Brazilian Journal of Infectious*  
406 *Diseases*, 19(2), 146-155. [doi: 10.1016/j.bjid.2014.10.004](https://doi.org/10.1016/j.bjid.2014.10.004)

407 Baddeley, A., Rubak, E., & Turner, R. (2015). *Spatial point patterns: methodology and*  
408 *applications with R*. Chapman and Hall/CRC.

- 409 Baddeley, A., Diggle, P. J., Hardegen, A., Lawrence, T., Milne, R. K., & Nair, G. (2014).  
410 On tests of spatial pattern based on simulation envelopes. *Ecological*  
411 *Monographs*, 84(3), 477-489. doi: [10.1890/13-2042.1](https://doi.org/10.1890/13-2042.1)
- 412 Brady, O. J., Golding, N., Pigott, D. M., Kraemer, M. U., Messina, J. P., Reiner Jr, R. C., ...  
413 & Hay, S. I. (2014). Global temperature constraints on *Aedes aegypti* and *Ae.*  
414 *albopictus* persistence and competence for dengue virus transmission. *Parasites &*  
415 *vectors*, 7(1), 338. doi: [10.1186/1756-3305-7-338](https://doi.org/10.1186/1756-3305-7-338)
- 416 Beaulieu, M. R. S., Hopperstad, K., Dunn, R. R., & Reiskind, M. H. (2019). Simplification  
417 of vector communities during suburban succession. *PloS one*, 14(5), e0215485. doi:  
418 [10.1371/journal.pone.0215485](https://doi.org/10.1371/journal.pone.0215485)
- 419 Borcard, D., & Legendre, P. (2002). All-scale spatial analysis of ecological data by  
420 means of principal coordinates of neighbour matrices. *Ecological modelling*, 153(1-2),  
421 51-68. doi: [10.1016/S0304-3800\(01\)00501-4](https://doi.org/10.1016/S0304-3800(01)00501-4)
- 422 Broennimann, O., Fitzpatrick, M. C., Pearman, P. B., Petitpierre, B., Pellissier, L., Yoccoz,  
423 N. G., ... & Graham, C. H. (2012). Measuring ecological niche overlap from occurrence  
424 and spatial environmental data. *Global ecology and biogeography*, 21(4), 481-497. doi:  
425 [10.1111/j.1466-8238.2011.00698.x](https://doi.org/10.1111/j.1466-8238.2011.00698.x)
- 426 Carrington, L. B., Seifert, S. N., Armijos, M. V., Lambrechts, L., & Scott, T. W. (2013).  
427 Reduction of *Aedes aegypti* vector competence for dengue virus under large  
428 temperature fluctuations. *The American journal of tropical medicine and*  
429 *hygiene*, 88(4), 689-697. doi:[10.4269/ajtmh.12-0488](https://doi.org/10.4269/ajtmh.12-0488)

- 430 Carlson, C. J., Dougherty, E., Boots, M., Getz, W., & Ryan, S. J. (2018). Consensus and  
431 conflict among ecological forecasts of Zika virus outbreaks in the United  
432 States. *Scientific reports*, 8(1), 4921. [doi:10.1038/s41598-018-22989-0](https://doi.org/10.1038/s41598-018-22989-0)
- 433 Center for International Earth Science Information Network – CIESIN – Columbia  
434 University. 2016. Global Urban Heat Island (UHI) Data Set, 2013. Palisades, NY: NASA  
435 Socioeconomic Data and Applications Center (SEDAC).
- 436 Chan, K. L. (1985). Singapore's dengue haemorrhagic fever control programme: a case  
437 study on the successful control of *Aedes aegypti* and *Aedes albopictus* using mainly  
438 environmental measures as a part of integrated vector control (No. 45). Southeast  
439 Asian Medical Information Center.
- 440 Cunze, S., Kochmann, J., Koch, L. K., & Klimpel, S. (2018). Niche conservatism of *Aedes*  
441 *albopictus* and *Aedes aegypti*-two mosquito species with different invasion  
442 histories. *Scientific reports*, 8(1), 7733. [doi: 10.1038/s41598-018-26092-2](https://doi.org/10.1038/s41598-018-26092-2)
- 443 Cummins, B., Cortez, R., Foppa, I. M., Walbeck, J., & Hyman, J. M. (2012). A spatial  
444 model of mosquito host-seeking behavior. *PLoS computational biology*, 8(5),  
445 e1002500. [doi: 10.1371/journal.pcbi.1002500](https://doi.org/10.1371/journal.pcbi.1002500)
- 446 Di Cola, V., Broennimann, O., Petitpierre, B., Breiner, F. T., D'amen, M., Randin, C., ... &  
447 Pellissier, L. (2017). ecospat: an R package to support spatial analyses and modeling of  
448 species niches and distributions. *Ecography*, 40(6), 774-787. [doi: 10.1111/ecog.02671](https://doi.org/10.1111/ecog.02671)

- 449 Fan, Y., Chen, J., Shirkey, G., John, R., Wu, S. R., Park, H., & Shao, C. (2016).  
450 Applications of structural equation modeling (SEM) in ecological studies: an updated  
451 review. *Ecological Processes*, 5(1), 19. doi: [10.1186/s13717-016-0063-3](https://doi.org/10.1186/s13717-016-0063-3)
- 452 Goslee, S. C., & Urban, D. L. (2007). The ecodist package for dissimilarity-based analysis  
453 of ecological data. *Journal of Statistical Software*, 22(7), 1-19.
- 454 Gotelli, N. J., & Colwell, R. K. (2001). Quantifying biodiversity: procedures and pitfalls in  
455 the measurement and comparison of species richness. *Ecology letters*, 4(4), 379-391.  
456 doi: [10.1046/j.1461-0248.2001.00230.x](https://doi.org/10.1046/j.1461-0248.2001.00230.x)
- 457 Gubler, D. J. (2001). Human arbovirus infections worldwide. *Annals of the New York*  
458 *Academy of Sciences*, 951(1), 13-24. doi: [10.1111/j.1749-6632.2001.tb02681.x](https://doi.org/10.1111/j.1749-6632.2001.tb02681.x)
- 459 Gubler, D. J. (2002). The global emergence/resurgence of arboviral diseases as public  
460 health problems. *Archives of medical research*, 33(4), 330-342. doi: [10.1016/S0188-](https://doi.org/10.1016/S0188-4409(02)00378-8)  
461 [4409\(02\)00378-8](https://doi.org/10.1016/S0188-4409(02)00378-8)
- 462 Gubler, D. J. (2002). Epidemic dengue/dengue hemorrhagic fever as a public health,  
463 social and economic problem in the 21st century. *Trends in microbiology*, 10(2), 100-  
464 103. doi: [10.1016/S0966-842X\(01\)02288-0](https://doi.org/10.1016/S0966-842X(01)02288-0)
- 465 Gubler, D. J. (2011). Dengue, urbanization and globalization: the unholy trinity of the  
466 21st century. *Tropical medicine and health*, 39(4SUPPLEMENT), S3-S11. doi:  
467 [10.2149/tmh.2011-S05](https://doi.org/10.2149/tmh.2011-S05)
- 468 Guerra, C. A., Reiner, R. C., Perkins, T. A., Lindsay, S. W., Midega, J. T., Brady, O. J., ... &  
469 Kitron, U. (2014). A global assembly of adult female mosquito mark-release-recapture

- 470 data to inform the control of mosquito-borne pathogens. *Parasites & vectors*, 7(1),  
471 276. doi: [10.1186/1756-3305-7-276](https://doi.org/10.1186/1756-3305-7-276)
- 472 Gloria-Soria, A., Lima, A., Lovin, D. D., Cunningham, J. M., Severson, D. W., & Powell, J.  
473 R. (2018). Origin of a high-latitude population of *Aedes aegypti* in Washington, DC. *The*  
474 *American journal of tropical medicine and hygiene*, 98(2), 445-452. doi:  
475 [10.4269/ajtmh.17-0676](https://doi.org/10.4269/ajtmh.17-0676)
- 476 Griffith, D. A. (2003). *Spatial autocorrelation and spatial filtering: gaining*  
477 *understanding through theory and scientific visualization*. Springer Science & Business  
478 Media.
- 479 Hahn, M. B., Eisen, R. J., Eisen, L., Boegler, K. A., Moore, C. G., McAllister, J., ... &  
480 Mutebi, J. P. (2016). Reported distribution of *aedes (stegomyia) aegypti* and *Aedes*  
481 *(stegomyia) albopictus* in the United States, 1995-2016 (diptera: culicidae). *Journal of*  
482 *medical entomology*, 53(5), 1169-1175. doi: [10.1093/jme/tjw072](https://doi.org/10.1093/jme/tjw072)
- 483 Hahn, M. B., Eisen, L., McAllister, J., Savage, H. M., Mutebi, J. P., & Eisen, R. J. (2017).  
484 Updated reported distribution of *Aedes (Stegomyia) aegypti* and *Aedes (Stegomyia)*  
485 *albopictus* (diptera: culicidae) in the United States, 1995–2016. *Journal of medical*  
486 *entomology*, 54(5), 1420-1424. doi: [10.1093/jme/tjx088](https://doi.org/10.1093/jme/tjx088)
- 487 Halstead, S. B. (2008). Dengue virus–mosquito interactions. *Annu. Rev. Entomol.*, 53,  
488 273-291. doi: [10.1146/annurev.ento.53.103106.093326](https://doi.org/10.1146/annurev.ento.53.103106.093326)
- 489 Hsieh, T. C., Ma, K. H., Chao, A., & Hsieh, M. T. (2016). Package ‘iNEXT’ version 2.0.19,  
490 2019.

- 491 Huey, R. B., Kearney, M. R., Krockenberger, A., Holtum, J. A., Jess, M., & Williams, S. E.  
492 (2012). Predicting organismal vulnerability to climate warming: roles of behaviour,  
493 physiology and adaptation. *Philosophical Transactions of the Royal Society B: Biological*  
494 *Sciences*, 367(1596), 1665-1679. doi: [10.1098/rstb.2012.0005](https://doi.org/10.1098/rstb.2012.0005)
- 495 Johnson, T. L., Haque, U., Monaghan, A. J., Eisen, L., Hahn, M. B., Hayden, M. H., ... &  
496 Eisen, R. J. (2017). Modeling the environmental suitability for *Aedes* (*Stegomyia*)  
497 *aegypti* and *Aedes* (*Stegomyia*) *albopictus* (Diptera: Culicidae) in the contiguous United  
498 States. *Journal of medical entomology*, 54(6), 1605-1614. doi: [10.1093/jme/tjx163](https://doi.org/10.1093/jme/tjx163)
- 499 Kaplan, L., Kendell, D., Robertson, D., Livdahl, T., & Khatchikian, C. (2010). *Aedes*  
500 *aegypti* and *Aedes albopictus* in Bermuda: extinction, invasion, invasion and  
501 extinction. *Biological invasions*, 12(9), 3277-3288. doi:[10.1007/s10530-010-9721-z](https://doi.org/10.1007/s10530-010-9721-z)
- 502 Kraemer, M. U., Sinka, M. E., Duda, K. A., Mylne, A., Shearer, F. M., Brady, O. J., ... &  
503 Coelho, G. E. (2015). The global compendium of *Aedes aegypti* and *Ae. albopictus*  
504 occurrence. *Scientific data*, 2, 150035. doi:[10.1038/sdata.2015.35](https://doi.org/10.1038/sdata.2015.35)
- 505 Kraemer, M. U., Sinka, M. E., Duda, K. A., Mylne, A. Q., Shearer, F. M., Barker, C. M., ...  
506 & Hendrickx, G. (2015). The global distribution of the arbovirus vectors *Aedes aegypti*  
507 and *Ae. albopictus*. *elife*, 4, e08347. doi:[10.7554/eLife.08347](https://doi.org/10.7554/eLife.08347)
- 508 Kraemer, M. U., Reiner, R. C., Brady, O. J., Messina, J. P., Gilbert, M., Pigott, D. M., ... &  
509 Shirude, S. (2019). Past and future spread of the arbovirus vectors *Aedes aegypti* and  
510 *Aedes albopictus*. *Nature microbiology*, 4(5), 854. doi:[10.1038/s41564-019-0376-y](https://doi.org/10.1038/s41564-019-0376-y)

- 511 Kraemer, M. U., Reiner Jr, R. C., & Bhatt, S. (2019). Causal inference in spatial  
512 mapping. *Trends in parasitology*, 35(10), 743-746. doi: [10.1016/j.pt.2019.06.005](https://doi.org/10.1016/j.pt.2019.06.005)
- 513 LaDeau, S. L., Allan, B. F., Leisnham, P. T., & Levy, M. Z. (2015). The ecological  
514 foundations of transmission potential and vector-borne disease in urban  
515 landscapes. *Functional Ecology*, 29(7), 889-901. doi: [10.1111/1365-2435.12487](https://doi.org/10.1111/1365-2435.12487)
- 516 Lambrechts, L., Scott, T. W., & Gubler, D. J. (2010). Consequences of the expanding  
517 global distribution of *Aedes albopictus* for dengue virus transmission. *PLoS neglected*  
518 *tropical diseases*, 4(5), e646. doi: [10.1371/journal.pntd.0000646](https://doi.org/10.1371/journal.pntd.0000646)
- 519 Legendre, P., & Legendre, L. F. (2012). *Numerical ecology* (Vol. 24). Elsevier.
- 520 Lobo, J. M., Jiménez-Valverde, A., & Hortal, J. (2010). The uncertain nature of absences  
521 and their importance in species distribution modelling. *Ecography*, 33(1), 103-114. doi:  
522 [10.1111/j.1600-0587.2009.06039.x](https://doi.org/10.1111/j.1600-0587.2009.06039.x)
- 523 Manoli, G., Fatichi, S., Schläpfer, M., Yu, K., Crowther, T. W., Meili, N., ... & Bou-Zeid, E.  
524 (2019). Magnitude of urban heat islands largely explained by climate and  
525 population. *Nature*, 573(7772), 55-60. doi:[10.1038/s41586-019-1512-9](https://doi.org/10.1038/s41586-019-1512-9)
- 526 Messina, J. P., Brady, O. J., Golding, N., Kraemer, M. U., Wint, G. W., Ray, S. E., ... &  
527 Marczak, L. B. (2019). The current and future global distribution and population at risk  
528 of dengue. *Nature microbiology*, 1. doi:[10.1038/s41564-019-0476-8](https://doi.org/10.1038/s41564-019-0476-8)
- 529 Misslin, R., Telle, O., Daudé, E., Vaguet, A., & Paul, R. E. (2016). Urban climate versus  
530 global climate change—what makes the difference for dengue? *Annals of the New York*  
531 *Academy of Sciences*, 1382(1), 56-72. doi: [10.1111/nyas.13084](https://doi.org/10.1111/nyas.13084)



- 532 Monath, T. P. (1994). Dengue: the risk to developed and developing  
533 countries. *Proceedings of the National Academy of Sciences*, 91(7), 2395-2400. doi:  
534 [10.1073/pnas.91.7.2395](https://doi.org/10.1073/pnas.91.7.2395)
- 535 Mordecai, E. A., Caldwell, J. M., Grossman, M. K., Lippi, C. A., Johnson, L. R., Neira, M.,  
536 ... & Sippy, R. (2019). Thermal biology of mosquito-borne disease. *Ecology letters*. doi:  
537 [10.1111/ele.13335](https://doi.org/10.1111/ele.13335)
- 538 Morin, C. W., Monaghan, A. J., Hayden, M. H., Barrera, R., & Ernst, K. (2015).  
539 Meteorologically driven simulations of dengue epidemics in San Juan, PR. *PLoS*  
540 *neglected tropical diseases*, 9(8), e0004002. doi: [10.1371/journal.pntd.0004002](https://doi.org/10.1371/journal.pntd.0004002)
- 541 Murray, K. A., Preston, N., Allen, T., Zambrana-Torrel, C., Hosseini, P. R., & Daszak, P.  
542 (2015). Global biogeography of human infectious diseases. *Proceedings of the National*  
543 *Academy of Sciences*, 112(41), 12746-12751. doi: [10.1073/pnas.1507442112](https://doi.org/10.1073/pnas.1507442112)
- 544 Murdock, C. C., Evans, M. V., McClanahan, T. D., Miazgowicz, K. L., & Tesla, B. (2017).  
545 Fine-scale variation in microclimate across an urban landscape shapes variation in  
546 mosquito population dynamics and the potential of *Aedes albopictus* to transmit  
547 arboviral disease. *PLoS neglected tropical diseases*, 11(5), e0005640. doi:  
548 [10.1371/journal.pntd.0005640](https://doi.org/10.1371/journal.pntd.0005640)
- 549 Ramos-Castaneda, J., dos Santos, F. B., Martinez-Vega, R., de Araujo, J. M. G., Joint, G.,  
550 & Sarti, E. (2017). Dengue in Latin America: systematic review of molecular  
551 epidemiological trends. *PLoS neglected tropical diseases*, 11(1), e0005224. doi:  
552 [10.1371/journal.pntd.0005224](https://doi.org/10.1371/journal.pntd.0005224)

- 553 Ryan, S. J., Carlson, C. J., Mordecai, E. A., & Johnson, L. R. (2019). Global expansion and  
554 redistribution of Aedes-borne virus transmission risk with climate change. PLoS  
555 neglected tropical diseases, 13(3), e0007213. doi: [10.1371/journal.pntd.0007213](https://doi.org/10.1371/journal.pntd.0007213)
- 556 Reisen, W. K., Lothrop, H. D., & Lothrop, B. (2003). Factors influencing the outcome of  
557 mark-release-recapture studies with Culex tarsalis (Diptera: Culicidae). Journal of  
558 medical entomology, 40(6), 820-829. doi: [10.1603/0022-2585-40.6.820](https://doi.org/10.1603/0022-2585-40.6.820)
- 559 Rosseel, Y. (2012). Lavaan: An R package for structural equation modeling and more.  
560 Version 0.5–12 (BETA). Journal of statistical software, 48(2), 1-36.
- 561 Rosenberg, R., Lindsey, N. P., Fischer, M., Gregory, C. J., Hinckley, A. F., Mead, P. S., ...  
562 & Hooks, H. (2018). Vital signs: trends in reported vectorborne disease cases—United  
563 States and territories, 2004–2016. Morbidity and Mortality Weekly Report, 67(17),  
564 496.
- 565 Stephens, P. R., Altizer, S., Smith, K. F., Alonso Aguirre, A., Brown, J. H., Budischak, S.  
566 A., ... & Ezenwa, V. O. (2016). The macroecology of infectious diseases: a new  
567 perspective on global-scale drivers of pathogen distributions and impacts. Ecology  
568 Letters, 19(9), 1159-1171. doi: [10.1111/ele.12644](https://doi.org/10.1111/ele.12644)
- 569 Stoddard, S. T., Morrison, A. C., Vazquez-Prokopec, G. M., Soldan, V. P., Kochel, T. J.,  
570 Kitron, U., ... & Scott, T. W. (2009). The role of human movement in the transmission of  
571 vector-borne pathogens. PLoS neglected tropical diseases, 3(7), e481. doi:  
572 [10.1371/journal.pntd.0000481](https://doi.org/10.1371/journal.pntd.0000481)

- 573 Thomson, M. C., Ukawuba, I., Hershey, C. L., Bennett, A., Ceccato, P., Lyon, B., & Dinku,  
574 T. (2017). Using rainfall and temperature data in the evaluation of national malaria  
575 control programs in Africa. *The American journal of tropical medicine and*  
576 *hygiene*, 97(3\_Suppl), 32-45. doi: [10.4269/ajtmh.16-0696](https://doi.org/10.4269/ajtmh.16-0696)
- 577 Tuanmu, M. N., & Jetz, W. (2014). A global 1-km consensus land-cover product for  
578 biodiversity and ecosystem modelling. *Global Ecology and Biogeography*, 23(9), 1031-  
579 1045. doi:[10.1111/geb.12182](https://doi.org/10.1111/geb.12182)
- 580 Van Panhuis, W. G., Choisy, M., Xiong, X., Chok, N. S., Akarasewi, P., Iamsirithaworn, S.,  
581 ... & Vongphrachanh, P. (2015). Region-wide synchrony and traveling waves of dengue  
582 across eight countries in Southeast Asia. *Proceedings of the National Academy of*  
583 *Sciences*, 112(42), 13069-13074. doi: [10.1073/pnas.1501375112](https://doi.org/10.1073/pnas.1501375112)
- 584 Vilela, B., & Villalobos, F. (2015). letsR: a new R package for data handling and analysis  
585 in macroecology. *Methods in Ecology and Evolution*, 6(10), 1229-1234. doi:  
586 [10.1111/2041-210X.12401](https://doi.org/10.1111/2041-210X.12401)
- 587 Walk, S. T., Xu, G., Stull, J. W., & Rich, S. M. (2009). Correlation between tick density  
588 and pathogen endemicity, New Hampshire. *Emerging infectious diseases*, 15(4), 585.  
589 doi: [10.3201/eid1504.080940](https://doi.org/10.3201/eid1504.080940)
- 590 Wand, M., Ripley, B., & Ripley, M. B. (2015). Package 'KernSmooth'.
- 591 Watts, N., Amann, M., Ayeb-Karlsson, S., Belesova, K., Bouley, T., Boykoff, M., ... & Cox,  
592 P. M. (2018). The Lancet Countdown on health and climate change: from 25 years of

593 inaction to a global transformation for public health. *The Lancet*, 391(10120), 581-630.

594 [doi: 10.1016/S0140-6736\(17\)32464-9](https://doi.org/10.1016/S0140-6736(17)32464-9)

595 Warren, D. L., Glor, R. E., & Turelli, M. (2008). Environmental niche equivalency versus

596 conservatism: quantitative approaches to niche evolution. *Evolution: International*

597 *Journal of Organic Evolution*, 62(11), 2868-2883. [doi: 10.1111/j.1558-](https://doi.org/10.1111/j.1558-)

598 [5646.2008.00482.x](https://doi.org/10.1111/j.1558-5646.2008.00482.x)

599 Wiegand, T., & Moloney, K. (2004). Rings, circles, and null-models for point pattern

600 analysis in ecology. *Oikos*, 104(2), 209-229. [doi: 10.1111/j.0030-1299.2004.12497.x](https://doi.org/10.1111/j.0030-1299.2004.12497.x)

601 World Health Organization. (2014). A global brief on vector-borne diseases (No.

602 WHO/DCO/WHD/2014.1). World Health Organization.

603 Zhao, L., Lee, X., Smith, R. B., & Oleson, K. (2014). Strong contributions of local

604 background climate to urban heat islands. *Nature*, 511(7508), 216.

605 [doi:10.1038/nature13462](https://doi.org/10.1038/nature13462)

606 **FIGURES AND TABLES**

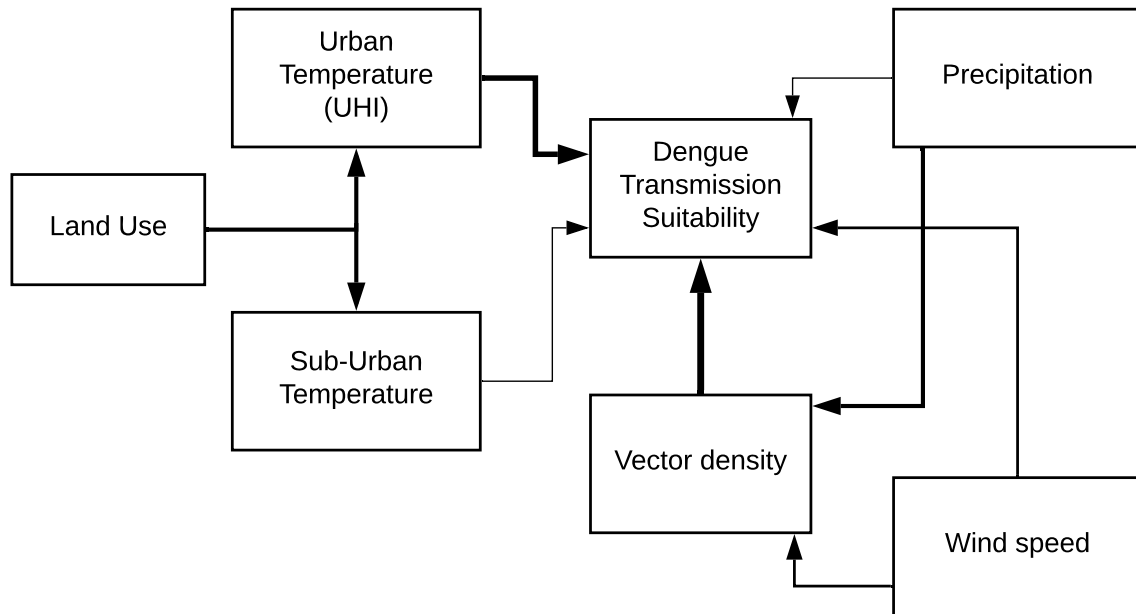

607

608 **Figure 1** Conceptual Path model defining the expected relations between predictors and

609 response.

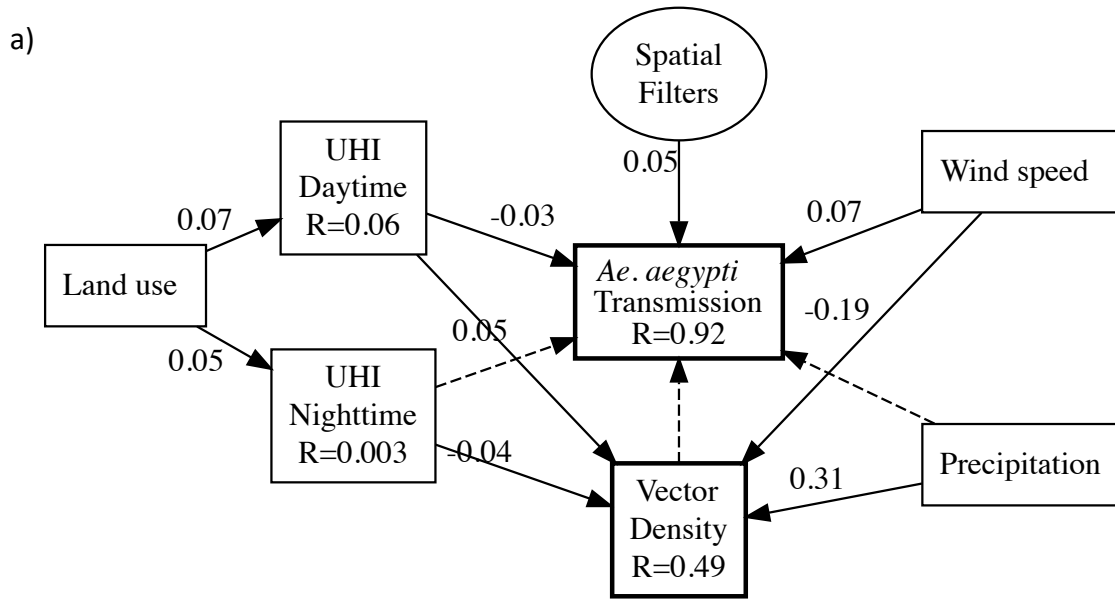

610

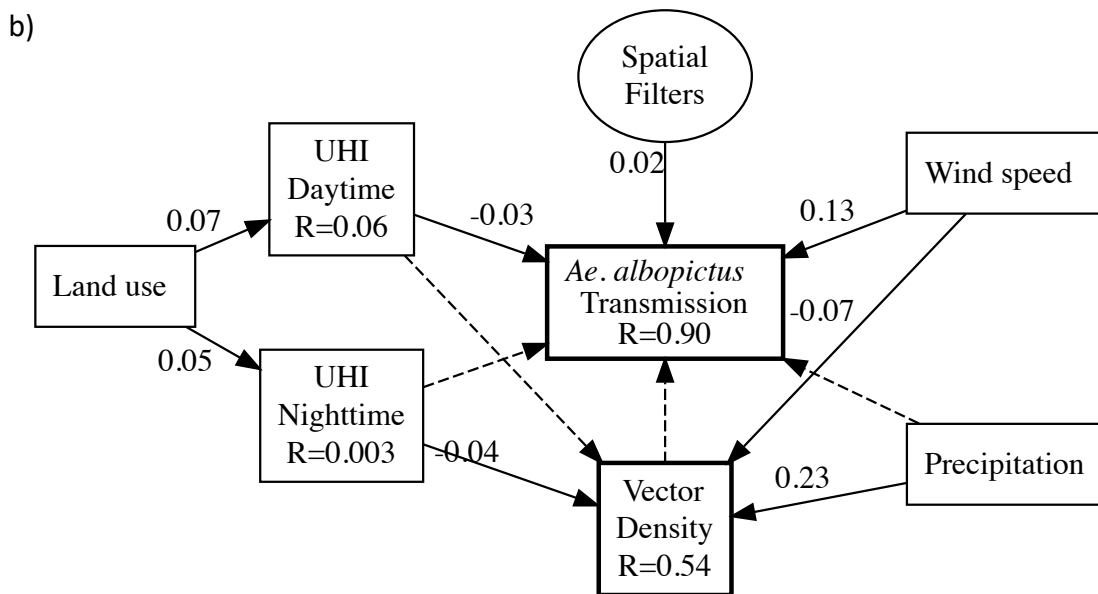

611

612 **Figure 2** Structural equation model outcome for a) *Ae. albopictus* and b) *Ae. aegypti*. R<sup>2</sup> is shown  
613 for the dependent variable. The values associated with arrows are standardized regression  
614 coefficients and dashed arrows indicate non-significance path coefficient (P > 0,05).

**Table 1** Table showing the outcome correlation coefficients of each path resulting from SEM analyses and the respective adjust of each model given the consideration autocorrelation by spatial filters.

|                                          | Vector: <i>Ae. Aegypti</i> |                | Vector: <i>Ae. albopictus</i> |                |
|------------------------------------------|----------------------------|----------------|-------------------------------|----------------|
|                                          | Parameter estimate         | Standard Error | Parameter estimate            | Standard Error |
| <b>Dengue transmission suitability ~</b> |                            |                |                               |                |
| Mosquito Density                         | -0.02*                     | 0.01           | -0.01                         | 0.01           |
| UHI Daytime                              | -0.03***                   | 0.02           | -0.03***                      | 0.02           |
| UHI Nighttime                            | 0.001                      | 0.01           | 0.002                         | 0.02           |
| Wind Speed                               | 0.07***                    | 0.01           | 0.013***                      | 0.03           |
| Precipitation                            | -0.03                      | 0.04           | -0.08                         | 0.04           |
| Spatial Filters                          | 0.04*                      | 0.01           | 0.02***                       | 0.01           |
| <b>Mosquito density ~</b>                |                            |                |                               |                |
| UHI Daytime                              | 0.05***                    | 0.03           | 0.02                          | 0.02           |
| UHI Nighttime                            | -0.04***                   | 0.02           | -0.04*                        | 0.01           |
| Wind Speed                               | -0.19***                   | 0.03           | -0.07***                      | 0.01           |
| Precipitation                            | 0.31***                    | 0.06           | 0.23***                       | 0.06           |
| Spatial Filters                          | 0.04                       | 0.04           | 0.03*                         | 0.02           |
| AIC                                      | 11631.864                  |                | 11845.485                     |                |
| AIC (nf)                                 | 15356.419                  |                | 15655.011                     |                |

\*p≤0.10.

\*\*\*p≤0.01.

(nf) No spatial Filter.

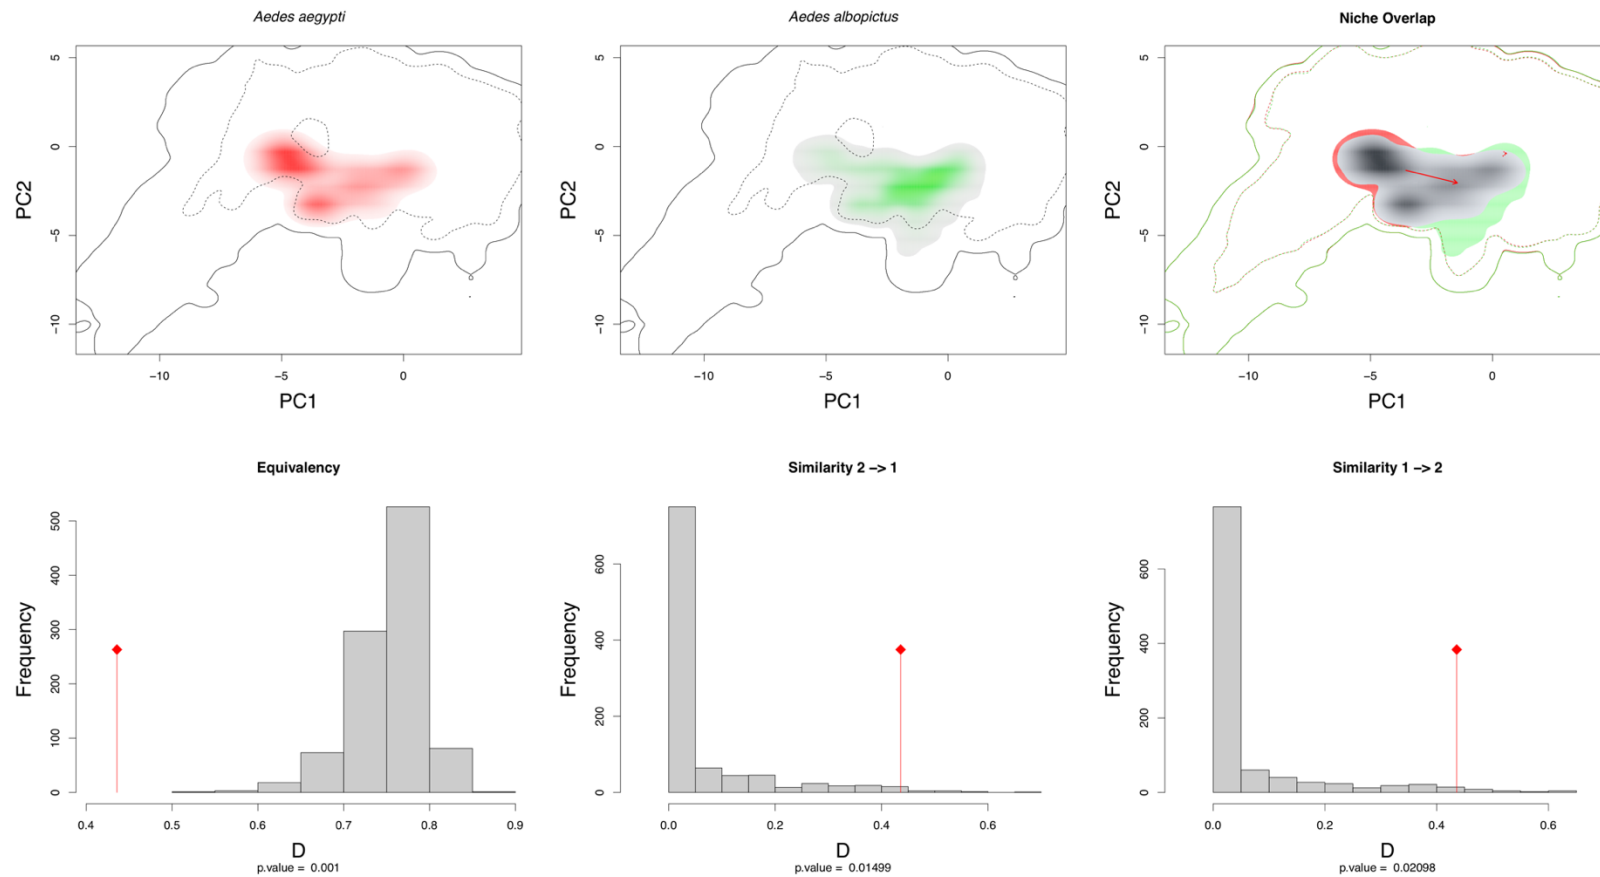

616  
 617 **Figure 3** Niche overlap and niche equivalence result showing the occupied climatic niches of *Aedes albopictus* and *Aedes aegypti* (Top left) in the niche space  
 618 available, and the amount of niche overlap between them (Top right). Both ways intersection (Bottom right) showed higher overlap degree than expected  
 619 by the null model (*i.e.*, Schoener's  $D > 0.4$ ). In spite of highly overlapped, their niche spaces are not equal (Bottom left).



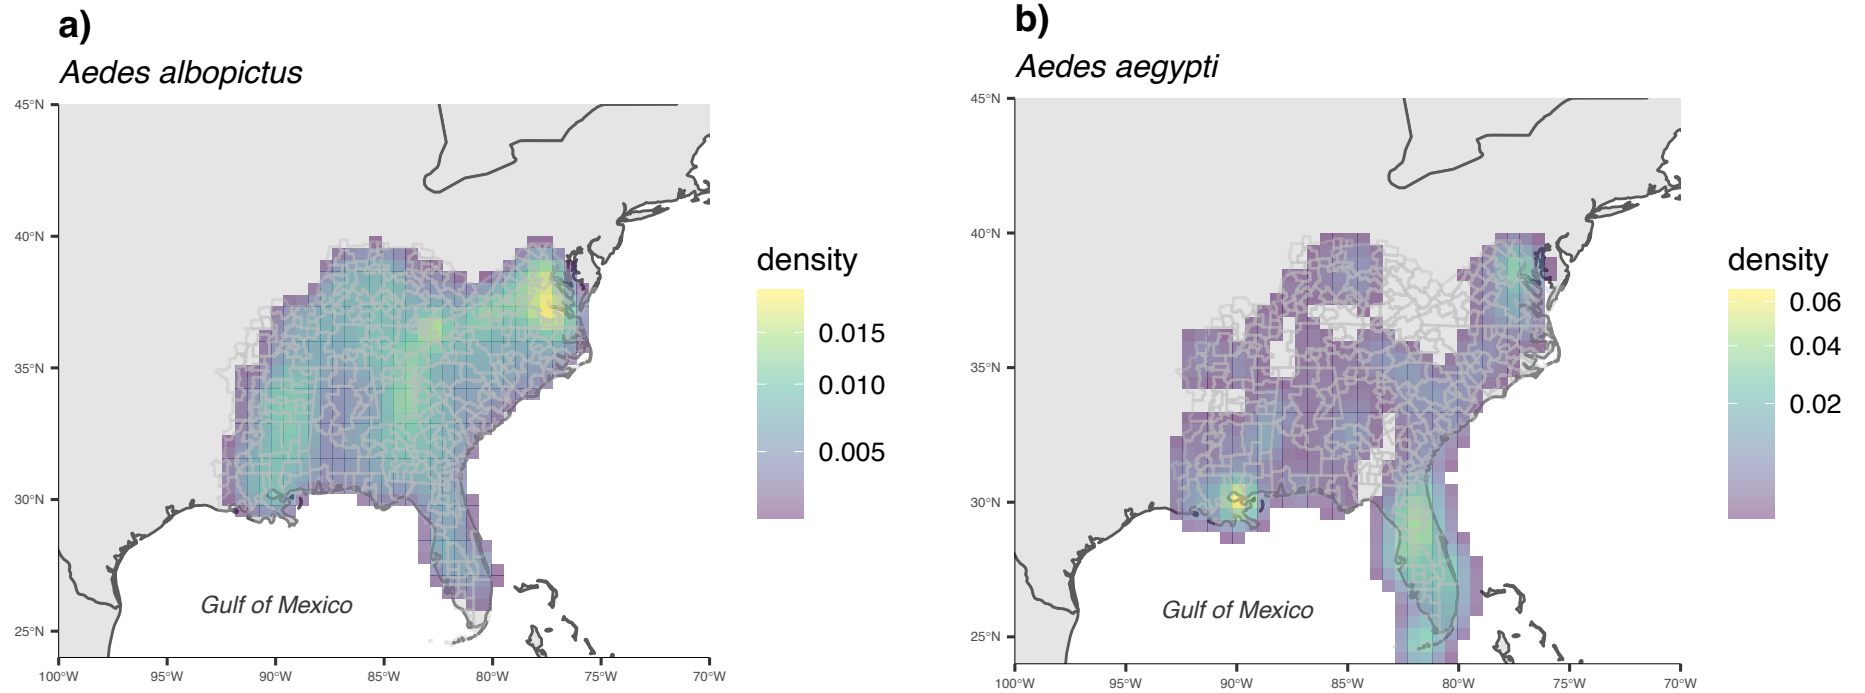

**Figure 4** *Aedes albopictus* (a) and *Aedes aegypti* (b) spatial density estimation based on Kernel smooth approach of available occurrence records.
